# Supplementary material
Source: HighWire-hosted journal article supplement (https://www.cmaj.ca/highwire/filestream/74759/field_highwire_adjunct_files/10/190757-res-7-at.pdf)
Supplement: 190757-res-7-at.pdf [file 190757-res-7-at.pdf]

**Appendix 7 (as supplied by the authors): Model output for number of consultations**

|                             | 37 conditions    |         |                  |         |                        |         | 20 conditions    |         |                  |         |                        |         |
|-----------------------------|------------------|---------|------------------|---------|------------------------|---------|------------------|---------|------------------|---------|------------------------|---------|
|                             | NB model         |         | Count model      |         | Binary model P(cons>0) |         | NB model         |         | Count model      |         | Binary model P(cons>0) |         |
|                             | RR (95% CI)      | p-value | RR (95% CI)      | p-value | OR (95% CI)            | p-value | RR (95% CI)      | p-value | RR (95% CI)      | p-value | OR (95% CI)            | p-value |
| Atrial fibrillation         | 1.52 (1.49-1.55) | <0.001  |                  |         |                        |         | 1.52 (1.49-1.55) | <0.001  |                  |         |                        |         |
| Diabetes                    | 1.40 (1.39-1.42) | <0.001  |                  |         |                        |         | 1.40 (1.38-1.42) | <0.001  |                  |         |                        |         |
| Painful condition           | 1.34 (1.33-1.35) | <0.001  |                  |         |                        |         | 1.35 (1.33-1.36) | <0.001  |                  |         |                        |         |
| COPD                        | 1.30 (1.27-1.32) | <0.001  |                  |         |                        |         | 1.31 (1.28-1.33) | <0.001  |                  |         |                        |         |
| Cancer                      | 1.28 (1.25-1.31) | <0.001  |                  |         |                        |         | 1.27 (1.25-1.30) | <0.001  |                  |         |                        |         |
| Constipation                | 1.24 (1.22-1.27) | <0.001  |                  |         |                        |         | 1.27 (1.24-1.29) | <0.001  |                  |         |                        |         |
| Connective tissue disorders | 1.25 (1.23-1.28) | <0.001  | 1.68 (1.58-1.78) | <0.001  | 5.96 (2.19-16.18)      | <0.001  | 1.27 (1.24-1.29) | <0.001  | 1.69 (1.59-1.80) | <0.001  | 5.83 (2.13-15.96)      | 0.001   |
| Psychosis/bipolar disorder  | 1.25 (1.21-1.29) | <0.001  |                  |         |                        |         | 1.25 (1.22-1.29) | <0.001  |                  |         |                        |         |
| Epilepsy                    | 1.23 (1.20-1.27) | <0.001  |                  |         |                        |         | 1.25 (1.21-1.28) | <0.001  |                  |         |                        |         |
| Anxiety/Depression          | 1.25 (1.23-1.26) | <0.001  |                  |         |                        |         | 1.24 (1.23-1.26) | <0.001  |                  |         |                        |         |
| Irritable bowel syndrome    | 1.18 (1.16-1.20) | <0.001  | 1.42 (1.38-1.46) | <0.001  | 3.61 (2.77-4.71)       | <0.001  | 1.20 (1.18-1.22) | <0.001  | 1.44 (1.41-1.48) | <0.001  | 3.54 (2.72-4.62)       | <0.001  |
| Heart failure               | 1.18 (1.14-1.21) | <0.001  | 2.69 (2.04-3.55) | <0.001  | 2.23 (0.43-11.64)      | 0.343   | 1.18 (1.15-1.22) | <0.001  | 2.65 (2.01-3.50) | <0.001  | 2.29 (0.41-12.91)      | 0.346   |
| Asthma                      | 1.16 (1.14-1.17) | <0.001  |                  |         |                        |         | 1.16 (1.14-1.17) | <0.001  |                  |         |                        |         |
| Dementia                    | 1.14 (1.11-1.18) | <0.001  |                  |         |                        |         | 1.14 (1.10-1.18) | <0.001  |                  |         |                        |         |
| Coronary heart disease      | 1.13 (1.11-1.14) | <0.001  |                  |         |                        |         | 1.13 (1.11-1.14) | <0.001  |                  |         |                        |         |
| Stroke & TIA                | 1.12 (1.10-1.14) | <0.001  |                  |         |                        |         | 1.12 (1.10-1.14) | <0.001  |                  |         |                        |         |
| Hearing loss                | 1.10 (1.08-1.11) | <0.001  | 1.18 (1.15-1.21) | <0.001  | 2.53 (2.15-2.97)       | <0.001  | 1.11 (1.09-1.12) | <0.001  | 1.19 (1.16-1.22) | <0.001  | 2.53 (2.15-2.98)       | <0.001  |
| Alcohol problems            | 1.07 (1.04-1.11) | <0.001  | 1.35 (1.26-1.44) | <0.001  | 1.57 (1.19-2.07)       | 0.002   | 1.09 (1.06-1.13) | <0.001  | 1.41 (1.32-1.51) | <0.001  | 1.65 (1.25-2.18)       | <0.001  |
| Chronic kidney disease      | 1.08 (1.06-1.09) | <0.001  |                  |         |                        |         | 1.08 (1.06-1.09) | <0.001  |                  |         |                        |         |
| Hypertension                | 1.08 (1.07-1.09) | <0.001  |                  |         |                        |         | 1.07 (1.06-1.08) | <0.001  |                  |         |                        |         |
| Parkinson's disease         | 1.29 (1.22-1.36) | <0.001  |                  |         |                        |         |                  |         |                  |         |                        |         |
| Inflammatory bowel disease  | 1.25 (1.20-1.30) | <0.001  | 1.78 (1.66-1.90) | <0.001  | 4.58 (2.20-9.51)       | <0.001  |                  |         |                  |         |                        |         |
| Multiple sclerosis          | 1.25 (1.18-1.32) | <0.001  |                  |         |                        |         |                  |         |                  |         |                        |         |
| Bronchiectasis              | 1.22 (1.16-1.28) | <0.001  | 1.42 (1.20-1.69) | <0.001  | 1.92 (0.47-7.77)       | 0.363   |                  |         |                  |         |                        |         |
| Psoriasis or eczema         | 1.19 (1.16-1.22) | <0.001  |                  |         |                        |         |                  |         |                  |         |                        |         |
| Learning disability         | 1.15 (1.10-1.21) | <0.001  |                  |         |                        |         |                  |         |                  |         |                        |         |
| Migraine                    | 1.13 (1.09-1.18) | <0.001  |                  |         |                        |         |                  |         |                  |         |                        |         |

|                             |                  |        |                  |        |                    |        |                  |        |                  |        |                     |        |
|-----------------------------|------------------|--------|------------------|--------|--------------------|--------|------------------|--------|------------------|--------|---------------------|--------|
| Prostate disorders          | 1.13 (1.11-1.15) | <0.001 |                  |        |                    |        |                  |        |                  |        |                     |        |
| Chronic Liver Disease       | 1.13 (1.07-1.18) | <0.001 | 1.29 (1.17-1.43) | <0.001 | 4.48 (1.57-12.75)  | 0.005  |                  |        |                  |        |                     |        |
| Substance misuse            | 1.13 (1.09-1.17) | <0.001 | 1.30 (1.21-1.39) | <0.001 | 1.48 (1.14-1.91)   | 0.003  |                  |        |                  |        |                     |        |
| Anorexia or bulimia         | 1.11 (1.05-1.17) | <0.001 | 1.16 (1.06-1.26) | 0.001  | 1.10 (0.56-2.14)   | 0.782  |                  |        |                  |        |                     |        |
| Chronic sinusitis           | 1.11 (1.09-1.13) | <0.001 | 1.26 (1.21-1.31) | <0.001 | 3.46 (2.31-5.20)   | <0.001 |                  |        |                  |        |                     |        |
| Thyroid disorders           | 1.09 (1.08-1.11) | <0.001 |                  |        |                    |        |                  |        |                  |        |                     |        |
| Peripheral vascular disease | 1.06 (1.03-1.10) | <0.001 |                  |        |                    |        |                  |        |                  |        |                     |        |
| Diverticular disease        | 1.06 (1.04-1.08) | <0.001 |                  |        |                    |        |                  |        |                  |        |                     |        |
| Peptic ulcer disease        | 1.04 (1.01-1.06) | 0.007  | 0.57 (0.37-0.88) | 0.011  | 1.75 (1.14-2.70)   | 0.011  |                  |        |                  |        |                     |        |
| Blindness and low vision    | 1.02 (0.99-1.05) | 0.200  | 1.13 (1.02-1.25) | 0.021  | 1.67 (0.91-3.08)   | 0.100  |                  |        |                  |        |                     |        |
| Male                        | 0.85 (0.84-0.86) | <0.001 | 0.65 (0.64-0.66) | <0.001 | 0.10 (0.09-0.12)   | <0.001 | 0.86 (0.85-0.87) | <0.001 | 0.66 (0.65-0.66) | <0.001 | 0.09 (0.07-0.11)    | <0.001 |
| Age at index date (10 yrs)  | 1.09 (1.07-1.11) | <0.001 | 1.07 (1.05-1.10) | <0.001 | 1.14 (1.04-1.25)   | 0.006  | 1.10 (1.08-1.11) | <0.001 | 1.08 (1.05-1.10) | <0.001 | 1.15 (1.05-1.27)    | 0.003  |
| Age 21/30                   | 1.26 (1.20-1.33) | <0.001 | 1.19 (1.11-1.28) | <0.001 | 0.93 (0.70-1.24)   | 0.621  | 1.26 (1.20-1.32) | <0.001 | 1.19 (1.11-1.28) | <0.001 | 0.92 (0.69-1.22)    | 0.552  |
| Age 31/40                   | 1.17 (1.13-1.21) | <0.001 | 1.11 (1.05-1.17) | <0.001 | 0.95 (0.77-1.16)   | 0.588  | 1.17 (1.13-1.21) | <0.001 | 1.11 (1.06-1.17) | <0.001 | 0.93 (0.76-1.14)    | 0.51   |
| Age 41/50                   | 1.05 (1.03-1.07) | <0.001 | 1.00 (0.97-1.03) | 0.824  | 1.06 (0.94-1.21)   | 0.333  | 1.05 (1.03-1.07) | <0.001 | 1.00 (0.97-1.03) | 0.952  | 1.05 (0.93-1.20)    | 0.432  |
| Age 61/70                   | 1.02 (1.00-1.04) | 0.093  | 1.11 (1.07-1.15) | <0.001 | 1.95 (1.58-2.39)   | <0.001 | 1.02 (1.00-1.04) | 0.033  | 1.11 (1.07-1.15) | <0.001 | 2.01 (1.62-2.50)    | <0.001 |
| Age 71/80                   | 1.07 (1.04-1.11) | <0.001 | 1.27 (1.20-1.35) | <0.001 | 3.41 (2.05-5.66)   | <0.001 | 1.09 (1.05-1.12) | <0.001 | 1.27 (1.20-1.35) | <0.001 | 3.74 (2.12-6.58)    | <0.001 |
| Age 81/max                  | 1.10 (1.05-1.15) | <0.001 | 1.43 (1.29-1.57) | <0.001 | 0.75 (0.47-1.19)   | 0.221  | 1.11 (1.05-1.16) | <0.001 | 1.41 (1.28-1.56) | <0.001 | 0.76 (0.47-1.21)    | 0.241  |
| incfu                       |                  |        | 0.57 (0.55-0.60) | <0.001 | 0.25 (0.23-0.28)   | <0.001 |                  |        | 0.56 (0.54-0.59) | <0.001 | 0.27 (0.24-0.30)    | <0.001 |
| _cons                       | 3.43 (3.16-3.73) | <0.001 | 2.55 (2.24-2.90) | <0.001 | 15.81 (9.25-27.01) | <0.001 | 3.49 (3.21-3.80) | <0.001 | 2.53 (2.23-2.89) | <0.001 | 18.33 (10.52-31.94) | <0.001 |
